# Supplementary material for: Alcohol Consumption in Diabetic Patients with Nonalcoholic Fatty Liver Disease
Source: Hindawi journal article supplement (doi:10.1155/2017/7927685), 2017-01-01
Supplement: f1 [file 7927685.f1.pdf]

**Supplementary Table 1:** AUDIT questionnaire breakdown according to lifetime drinking history.

|                                         | <b>Non<br/>drinker</b> | <b>Light<br/>drinker</b> | <b>Moderate<br/>Drinker</b> | <b>Crude P<br/>Values</b> |
|-----------------------------------------|------------------------|--------------------------|-----------------------------|---------------------------|
| <b>Consumption score &lt;6</b>          | 46 (100)               | 70 (100)                 | 32 (91.4)                   | 0.012                     |
| <b>Dependence Score &lt;4</b>           | 46 (100)               | 70 (100)                 | 35 (100)                    | 1.000 <sup>a</sup>        |
| <b>Alcohol related harm score &lt;1</b> | 46 (100)               | 60 (85.7)                | 15 (42.9)                   | 0.000                     |
| <b>AUDIT score &lt; 7</b>               | 46 (100)               | 69 (98.6)                | 29 (82.9)                   | 0.001                     |

Data presented categorically (n, %) and analysed using a Pearson  $\chi^2$  test, unless specified; <sup>a</sup> Data presented categorically n (%) and analysed using Fisher's exact test.
